# Supplementary material for: Correlation of Ultrasonic Elastography of the Lens With Refractive Error and Biometric Parameters in Non-presbyopic and Presbyopic Patients
Source: Research Square preprint supplement (doi:10.21203/rs.3.rs-7933992/v1), 2025-11-10
Supplement: Supplementary file 1 [file 1e25786d09f0598948070739.docx]

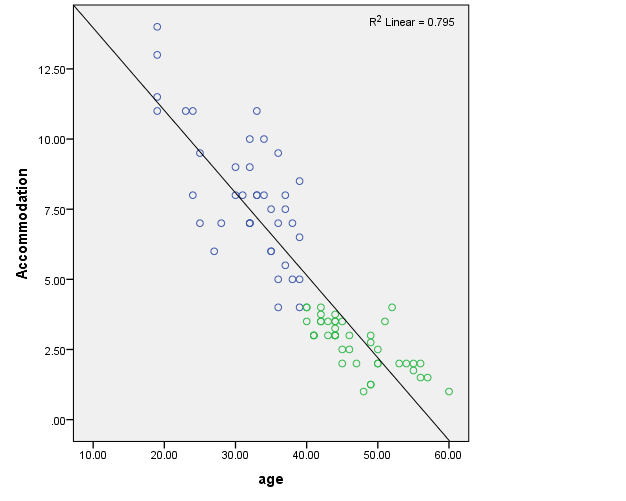

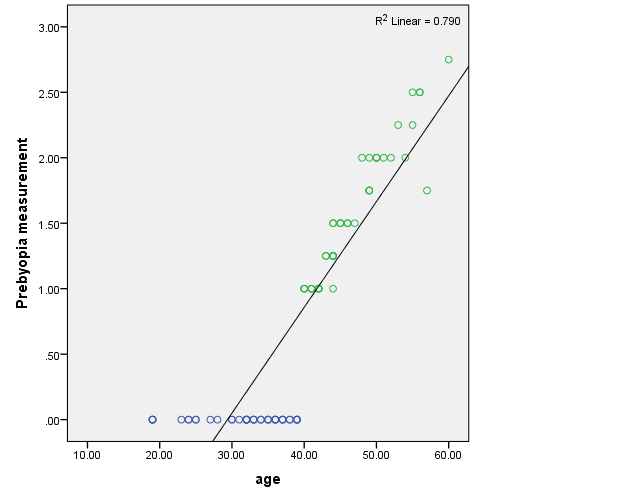

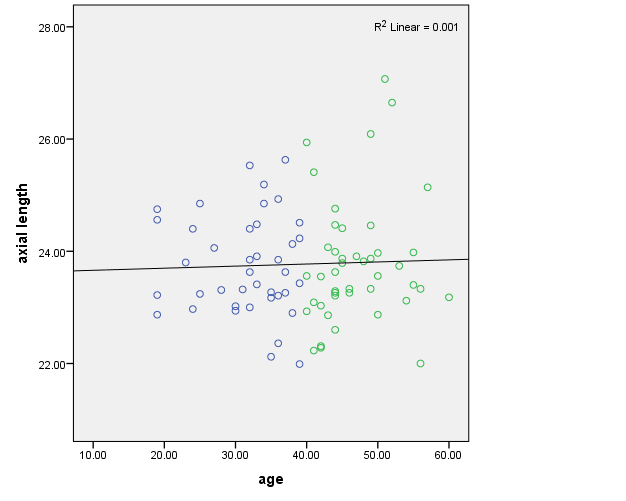

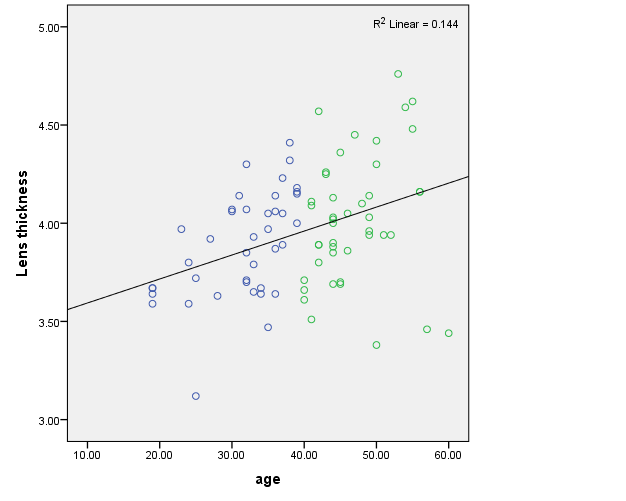


*
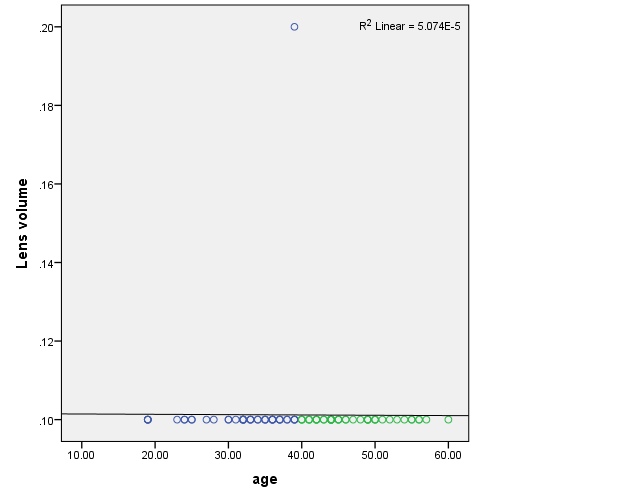

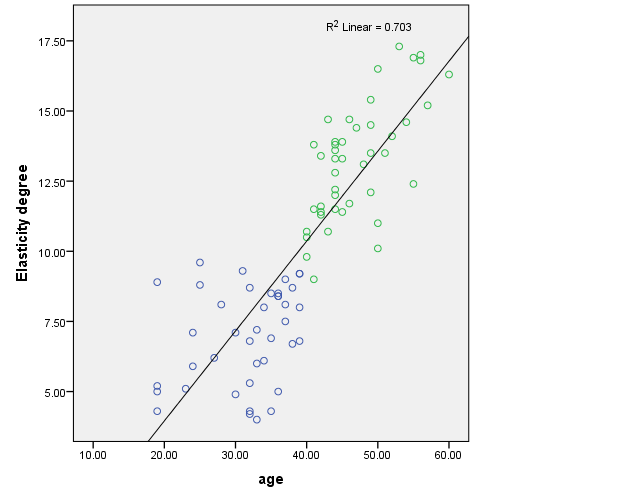

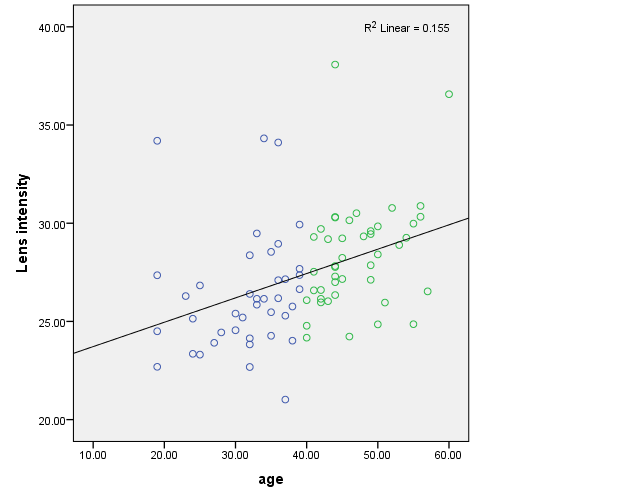
*

#####

##### **Supplementary Figure 1**: Scatter plots illustrate the patterns of correlation between age and a) accommodation, b) degree of presbyopia c) Axial length, d) lens thickness e)lens volume, f) lens elasticity degree and e) lens intensity
